# Supplementary material
Source: publisher figshare collection journal article supplement (https://diabetesjournals.figshare.com/ndownloader/files/24155594)
Supplement: Supplementary file 1 [file 24155594]

## Supplementary appendix

### Comparison of preoperative remission scores and diabetes duration alone as predictors of durable type 2 diabetes remission and risk of diabetes complications after bariatric surgery: a post-hoc analysis of participants from the Swedish Obese Subjects study

Kajsa Sjöholm, Lena MS Carlsson, Magdalena Taube, et al

| <b>Table of contents</b>                                                                                              | <b>Page</b> |
|-----------------------------------------------------------------------------------------------------------------------|-------------|
| The Swedish Obese Subjects (SOS) study design                                                                         | 2           |
| sTable 1. Score prediction models                                                                                     | 3           |
| sTable 2. International Classification of Diseases and intervention codes for microvascular and macrovascular events  | 5           |
| sTable 3. Predictive capacity of scores and duration in relation to type of surgical procedure                        | 9           |
| sTable 4. Youden empirical estimation of optimal score and duration cut-offs within the SOS surgery cohort            | 10          |
| sTable 5. Derivation and validation of risk prediction models- a literature overview                                  | 11          |
| sFigure 1. Patient eligibility and remission/complication rates during follow-up                                      | 13          |
| sFigure 2. Remission and complication rate by previously proposed score groups                                        | 14          |
| sFigure 3. Diagnostic value of scores, and diabetes duration for complete diabetes remission in the SOS surgery group | 15          |
| sFigure 4. Calibration analysis of predicted versus observed diabetes remission                                       | 16          |
| References                                                                                                            | 17          |

### **The Swedish Obese Subjects (SOS) study design**

After recruitment campaigns in the mass media and at 480 primary health-care centers, a matching examination was completed by 6905 patients, 5335 of which were eligible. Among them, 2010 individuals electing surgery formed the surgery group, and a matched control group of 2037 individuals was contemporaneously created using 18 matching variables. The matching variables were sex, age, weight, height, waist and hip circumferences, systolic blood pressure, serum cholesterol and triglyceride levels, smoking status, diabetes, menopausal status, four psychosocial variables with documented associations with the risk of death, and two personality traits related to treatment preferences. A matching algorithm selected controls so that the current mean values of the matching variables in the control group became as similar as possible to the current mean values in the surgery group according to the method of sequential treatment assignment (1). The inclusion and exclusion criteria were identical for the two study groups, and all participants were eligible for surgery. The inclusion criteria were aged 37 to 60 years and BMI of 34 kg/m<sup>2</sup> or more for men and 38 kg/m<sup>2</sup> or more for women before or at the matching examination. The BMI cutoffs corresponded to an approximate doubling in the rate of death in men and women (2). The exclusion criteria were earlier surgery for gastric or duodenal ulcer, earlier bariatric surgery, gastric ulcer during the past 6 months, ongoing malignancy, active malignancy during the past 5 years, myocardial infarction during the past 6 months, bulimic eating pattern, drug or alcohol abuse, psychiatric or cooperative problems contraindicating bariatric surgery, other contraindicating conditions (such as chronic glucocorticoid or anti-inflammatory treatment). Patients were recruited between September 1, 1987, and January 31, 2001. The intervention began on the day of surgery for subjects in the surgery group and for their matched controls. The type of surgery was determined by surgeons at the participating surgical departments. No attempt was made to standardize the non-surgical treatment, which ranged from advanced life-style advice at some centers to no treatment in others. About four weeks before the start of the intervention, baseline examinations were done and follow up examinations were scheduled at 0.5, 1, 2, 3, 4, 6, 8, 10, 15 and 20 years. Blood samples were taken after an overnight fast at baseline and after 2, 10, and 15 years. From 1987 to 2009, glucose concentrations were measured in venous whole blood at the Central Laboratory, Sahlgrenska University Hospital, accredited according to ISO/IEC 189. After August 1, 2009, venous plasma glucose has been measured and converted to blood glucose according to the instructions from the Central Laboratory (blood glucose = plasma glucose / 1.12). The SOS study was started before repeated measurements were routinely used for the diagnosis of type 2 diabetes, and single determinations of fasting glucose or HbA1c, were therefore used. Self-reported medication and diabetes duration was obtained from SOS questionnaires.

**sTable 1. Score prediction models**

|                                                | ABCD (3) |       | DiaRem (4)                                             |       | Ad-DiaRem (5)                              |       | DiaBetter (6)                  |       | IMS <sup>a</sup> (7) |       |
|------------------------------------------------|----------|-------|--------------------------------------------------------|-------|--------------------------------------------|-------|--------------------------------|-------|----------------------|-------|
| Prediction factor                              |          | Score |                                                        | Score |                                            | Score |                                | Score |                      | Score |
| Age (y)                                        | ≥40      | 0     | <40                                                    | 0     | 15-41                                      | 0     |                                |       |                      |       |
|                                                | <40      | 1     | 40-49                                                  | 1     | 42-52                                      | 3     |                                |       |                      |       |
|                                                |          |       | 50-59                                                  | 2     | 52-69                                      | 5     |                                |       |                      |       |
|                                                |          |       | ≥60                                                    | 3     |                                            |       |                                |       |                      |       |
| BMI (kg/m <sup>2</sup> )                       | <30      | 0     |                                                        |       |                                            |       |                                |       |                      |       |
|                                                | 30-39    | 1     |                                                        |       |                                            |       |                                |       |                      |       |
|                                                | 40-49    | 2     |                                                        |       |                                            |       |                                |       |                      |       |
|                                                | >50      | 3     |                                                        |       |                                            |       |                                |       |                      |       |
| C-peptide (ng/ml)                              | 0.9-1.9  | 0     |                                                        |       |                                            |       |                                |       |                      |       |
|                                                | 2.0-3.9  | 1     |                                                        |       |                                            |       |                                |       |                      |       |
|                                                | 4-6      | 2     |                                                        |       |                                            |       |                                |       |                      |       |
|                                                | >6       | 3     |                                                        |       |                                            |       |                                |       |                      |       |
| HbA1C (mmol/mol (%))                           |          |       | <48 (6.5)                                              | 0     | 26 (4.5)- 52 (6.9)                         | 0     | ≤48 (6.5)                      | 0     | <53 (7)              | 0     |
|                                                |          |       | ≥48 (6.5) – ≤52 (6.9)                                  | 2     | 53 (7.0) -57 (7.4)                         | 2     | 49 (6.6) - 55 (7.2)            | 1     | ≥53 (7)              | 16    |
|                                                |          |       | ≥53 (7.0) - ≤74 (8.9)                                  | 4     | 58 (7.5) -178 (18.4)                       | 4     | 56 (7.3) – 68 (8.4)            | 2     |                      |       |
|                                                |          |       | ≥75 (9.0)                                              | 6     | -                                          | -     | ≥69 (8.5)                      | 3     |                      |       |
| Insulin treatment                              |          |       | No                                                     | 0     | No                                         | 0     | No                             | 0     | No                   | 0     |
|                                                |          |       | Yes                                                    | 10    | Yes                                        | 3     | Yes (alone or in combination)  | 3     | Yes                  | 18    |
| Metformin                                      |          |       | Only metformin                                         | 0     | Only metformin                             | 0     | Only metformin                 | 1     |                      |       |
| Other anti-diabetic drugs                      |          |       | SU and insulin sensitizing agents other than metformin | 3     | Other glucose lowering agents <sup>b</sup> | 1     | Only other non-insulin drug(s) | 2     |                      |       |
| Number of glucose-lowering agents <sup>c</sup> |          |       |                                                        |       | 0                                          | 0     |                                |       | 0                    | 0     |
|                                                |          |       |                                                        |       | 1                                          | 1     |                                |       | 1                    | 12.6  |
|                                                |          |       |                                                        |       | 2                                          | 2     |                                |       | 2                    | 25.2  |
|                                                |          |       |                                                        |       | ≥3                                         | 3     |                                |       | 3                    | 37.8  |
|                                                |          |       |                                                        |       |                                            |       |                                |       | 4                    | 50.4  |
|                                                |          |       |                                                        |       |                                            |       |                                |       | 5                    | 63    |
| Diabetes Duration                              | >10      | 0     |                                                        |       | 0-6.9                                      | 0     | ≤2                             | 0     | 0                    | 0     |

|                       |       |             |  |             |           |             |             |            |                |                       |
|-----------------------|-------|-------------|--|-------------|-----------|-------------|-------------|------------|----------------|-----------------------|
|                       | 5-10  | 1           |  |             | 7-13.9    | 3           | 2.1-5.0     | 1          | 1-2-3-4-5      | 5.6-11.2-16.8-22.4-28 |
|                       | 2-4.9 | 2           |  |             | $\geq 14$ | 5           | 5.1-10.0    | 2          | 6-7-8-9-10     | 32-36-40-44-48        |
|                       | <2    | 3           |  |             | -         |             | $\geq 10.1$ | 3          | 11-12-13-14-15 | 50-52-54-56-58        |
|                       |       |             |  |             |           |             |             |            | 16--40         | 59.68--100            |
| <b>Range of score</b> |       | <b>0-10</b> |  | <b>0-22</b> |           | <b>0-21</b> |             | <b>0-9</b> |                | <b>0-197</b>          |

<sup>a</sup> For each additional duration year between 1-5 years, add 5.6 points; between 6-10 years, add 4 points; between 11-15 years, add 2 points; between 16-40 years, add 1.68 points.

<sup>b</sup> Includes sulfonylureas (glimepiride, glipizide and glibenclamide), insulin sensitizing agents other than metformin (pioglitazone and rosiglitazone).

<sup>c</sup> Includes sulfonylureas, insulin sensitizing agents and GLP-1 analogues, DDP-IV inhibitors, insulin and other glucose-lowering agents.

**sTable 2. Non-fatal and fatal diabetes complications according to ICD-9 and ICD-10 and according to Surgical procedures as coded in the National Swedish Patient Register (with inpatient and specialist outpatient care) and Cause of Death Register.**

Registry searches were performed using these codes and any sub-classifications thereof.

| Diagnosis                                                       | ICD-9                | ICD-10                   | Surgical procedures    | Procedure codes of National Swedish Board of Health and Welfare:<br><br>Classification of operations*<br>Ed. 5, 1985<br>Ed. 6, 1989,<br>both editions including also non-surgical procedures. | Procedure codes of National Swedish Board of Health and Welfare:<br><br>Classification of surgical procedures (KKÅ) 1997<br>Temporary list of non-surgical procedures (TÅL) 1997.<br>Swedish Classifications of Health Interventions (KVÅ) 2007†<br>including both surgical (KKÅ) and non-surgical (KMÅ) procedures. |
|-----------------------------------------------------------------|----------------------|--------------------------|------------------------|-----------------------------------------------------------------------------------------------------------------------------------------------------------------------------------------------|----------------------------------------------------------------------------------------------------------------------------------------------------------------------------------------------------------------------------------------------------------------------------------------------------------------------|
| <b>Microvascular diabetes complications, non-fatal or fatal</b> |                      |                          |                        |                                                                                                                                                                                               |                                                                                                                                                                                                                                                                                                                      |
| Kidney complications                                            | 250D                 | E11.2<br>E10.2‡<br>E14.2 | Kidney transplantation | 6070                                                                                                                                                                                          | KAS00<br>KAS10<br>KAS20                                                                                                                                                                                                                                                                                              |
| Diabetes nephropathy                                            |                      | N08.3                    | Kidney biopsy          | 6080<br>6081                                                                                                                                                                                  | KAB00<br>KAB01                                                                                                                                                                                                                                                                                                       |
| Albuminuria                                                     | 791A                 | R80<br>N39.1             | Hemodialysis           | 9211<br>9212                                                                                                                                                                                  | DR015<br>DR016<br>DR020<br>V9211<br>V9212                                                                                                                                                                                                                                                                            |
| Renal failure                                                   | 584 to<br>586        | N17 to<br>N19            |                        |                                                                                                                                                                                               |                                                                                                                                                                                                                                                                                                                      |
| Dialysis                                                        | V45B<br>V56A<br>V56W | Z99.2<br>Z49             | Peritoneal dialysis    | 9213<br>9214                                                                                                                                                                                  | DR023<br>DR024<br>JAK10<br>TJA20<br>TJA33<br>V9213<br>V9214                                                                                                                                                                                                                                                          |

|                                                                                      |              |                          |                                                      |                                              |                                                             |
|--------------------------------------------------------------------------------------|--------------|--------------------------|------------------------------------------------------|----------------------------------------------|-------------------------------------------------------------|
| Eye complications                                                                    | 250E         | E11.3<br>E10.3‡<br>E14.3 |                                                      |                                              |                                                             |
| Diabetes retinopathy                                                                 | 250E         | H36.0                    | Retinal operations                                   | 1630-1638                                    | CKC<br>CKD                                                  |
| Neurological complications                                                           | 250F         | E11.4<br>E10.4‡<br>E14.4 |                                                      |                                              |                                                             |
| Amyotrophy                                                                           |              | G73.0                    |                                                      |                                              |                                                             |
| Autonomous (poly)neuropathy                                                          | 357E         | G99.0                    |                                                      |                                              |                                                             |
| Mononeuropathy                                                                       |              | G59.0                    |                                                      |                                              |                                                             |
| Polyneuropathy                                                                       |              | G63.2                    |                                                      |                                              |                                                             |
| <b>Peripheral, mainly macrovascular diabetes complications, non-fatal and fatal§</b> |              |                          |                                                      |                                              |                                                             |
| Claudication, atherosclerosis of arteries of extremities                             | 443X<br>440C | I70.2                    | Amputations on leg or foot                           | 8750<br>8760<br>8770<br>8771<br>8780<br>8781 | NFQ<br>NGQ<br>NHQ                                           |
| Diabetes gangrene, diabetic foot                                                     | 250G         | E11.5<br>E10.5‡<br>E14.4 |                                                      |                                              |                                                             |
| Diabetes gangrene, cont.                                                             |              | I79.2                    |                                                      |                                              |                                                             |
|                                                                                      |              |                          | Operations on suprarenal aorta and visceral arteries | 0963<br>0964<br>0965                         | PCE<br>PCF<br>PCG<br>PCH<br>PCJ<br>PCK<br>PCN<br>PCP<br>PCQ |
|                                                                                      |              |                          | Operations on renal aorta and iliac arteries         | 8836<br>8837<br>8838<br>8839                 | PDE<br>PDF<br>PDG<br>PDH                                    |

|                                                                             |             |            |                            |                                                                                                                                                          |                                                                                                                                |
|-----------------------------------------------------------------------------|-------------|------------|----------------------------|----------------------------------------------------------------------------------------------------------------------------------------------------------|--------------------------------------------------------------------------------------------------------------------------------|
|                                                                             |             |            | Operations leg arteries    | 8884<br>8885<br>8815<br>8816<br>8817<br>8818<br><br>8861<br>8862<br>8865<br>8866<br>8868<br>8886<br>8887<br>8825<br>8826<br>8827<br>8828<br>8884<br>8885 | PDN<br>PDP<br>PDQ<br>PDS<br><br>PEE<br>PEF<br>PEG<br>PEH<br>PEN<br>PEP<br>PEQ<br>PFE<br>PFG<br>PFH<br>PFN<br>PFP<br>PFQ<br>PFS |
| Macrovascular centrally located diabetes complications, non-fatal or fatal§ |             |            |                            |                                                                                                                                                          |                                                                                                                                |
| Angina pectoris                                                             | 413         | I20        | Coronary artery operations | 3105<br>3127<br>3158                                                                                                                                     | FNA to FNK<br>FNW                                                                                                              |
| Acute myocardial infarction                                                 | 410<br>411  | I21<br>I22 |                            |                                                                                                                                                          |                                                                                                                                |
| Myocardial reinfarction                                                     | 412         | I23        | Heart transplantation      | 3085                                                                                                                                                     | FQA<br>FQB                                                                                                                     |
| Complications to myocardial inf.                                            | 414         | I24        |                            |                                                                                                                                                          |                                                                                                                                |
| Other ischemic conditions                                                   |             | I25        |                            |                                                                                                                                                          |                                                                                                                                |
| Heart failure                                                               | 428         | I50        |                            |                                                                                                                                                          |                                                                                                                                |
| Subarachnoidal bleeding                                                     | 430         | I60        | Aneurysm operations        | 0190<br>0191                                                                                                                                             | AAC<br>AAL                                                                                                                     |
| Hemorrhagia cerebri                                                         | 431<br>432x | I61<br>I62 | Arterial operations        | 0193                                                                                                                                                     | PAF<br>PAG                                                                                                                     |

|                     |     |     |  |  |            |
|---------------------|-----|-----|--|--|------------|
| Cerebral infarction | 434 | I63 |  |  | PAH        |
| Unspecified stroke  | 436 | I64 |  |  | PAJ<br>PAK |

\* First edition of Classification of Operations (Swedish: “Klassifikation av Operationer”) was printed by the National Swedish Board of Health and Welfare in 1963.

† KVÅ is available only online ([www.socialstyrelsen.se/klassificeringochkoder/atgardskoderkva](http://www.socialstyrelsen.se/klassificeringochkoder/atgardskoderkva)) and is updated annually since 2007. Older code lists were printed by the National Swedish Board of Health and Welfare.

‡ In the Swedish National Patient Registry and the Cause of Death Registry, complications of some typical type 2 diabetic individuals have erroneously been coded as type 1 diabetes (i.e. with E10# codes), particularly if they have obtained insulin treatment. Since we know that all patients in this report had type 2 diabetes at baseline (see Methods), we have included both E11 (type 2) and E10 (type 1) codes in our searches for complications of type 2 diabetes.

§ Since we know that all patients in this report had type 2 diabetes at the SOS baseline examination, we have considered claudication as well as heart and brain problems as diabetic complications even if diabetes is not a specified diagnosis in the corresponding hospital records.



**Table 3: Predictive capacity of scores and duration in relation to type of surgical procedure**

| Outcome*                           | Score/predictor          | AUROC (95% CI)          |                         |
|------------------------------------|--------------------------|-------------------------|-------------------------|
|                                    |                          | GBP†                    | Banding/VBG             |
| <b>10-year remission</b>           | N                        | 39                      | 188                     |
|                                    | ABCD                     | 0.77 (0.63-0.92)        | 0.69 (0.61-0.77)        |
|                                    | DiaRem                   | 0.72 (0.54-0.89)        | 0.72 (0.64-0.80)        |
|                                    | Ad-DiaRem                | 0.76 (0.60-0.92)        | 0.70 (0.62-0.78)        |
|                                    | DiaBetter                | 0.76 (0.60-0.91)        | 0.73 (0.65-0.81)        |
|                                    | IMS                      | 0.77 (0.61-0.92)        | 0.75 (0.67-0.82)        |
|                                    | <b>Diabetes duration</b> | <b>0.77 (0.64-0.91)</b> | <b>0.71 (0.64-0.77)</b> |
| <b>Microvascular complications</b> | N                        | 65                      | 298                     |
|                                    | ABCD                     | 0.80 (0.58-1.00)        | 0.68 (0.59-0.77)        |
|                                    | DiaRem                   | 0.83 (0.64-1.00)        | 0.76 (0.68-0.84)        |
|                                    | Ad-DiaRem                | 0.83 (0.64-1.00)        | 0.78 (0.71-0.85)        |
|                                    | DiaBetter                | 0.77 (0.51-1.00)        | 0.80 (0.73-0.86)        |
|                                    | IMS                      | 0.80 (0.58-1.00)        | 0.79 (0.73-0.85)        |
|                                    | <b>Diabetes duration</b> | <b>0.80 (0.58-1.00)</b> | <b>0.76 (0.69-0.83)</b> |
| <b>Macrovascular complications</b> | N                        | 65                      | 298                     |
|                                    | ABCD                     | 0.61 (0.45-0.77)        | 0.62 (0.55-0.69)        |
|                                    | DiaRem                   | 0.60 (0.43-0.77)        | 0.70 (0.64-0.77)        |
|                                    | Ad-DiaRem                | 0.64 (0.49-0.79)        | 0.71 (0.65-0.77)        |
|                                    | DiaBetter                | 0.56 (0.38-0.73)        | 0.68 (0.61-0.74)        |
|                                    | IMS                      | 0.59 (0.42-0.76)        | 0.68 (0.61-0.74)        |
|                                    | <b>Diabetes duration</b> | <b>0.63 (0.47-0.78)</b> | <b>0.65 (0.59-0.72)</b> |

\*Note that 2-year prediction of diabetes remission could not be performed due to very few non-remission cases at this timepoint.

†Prediction in the GBP subgroup should be interpreted with caution due to small numbers.

**sTable 4. Youden empirical estimation of optimal score and duration cut-offs within the SOS surgery cohort\*†**

| Endpoint                 | ABCD    |           | DiaRem  |           | Ad-DiaRem |           | DiaBetter |           | IMS     |           | Diabetes duration (years)‡ |           |
|--------------------------|---------|-----------|---------|-----------|-----------|-----------|-----------|-----------|---------|-----------|----------------------------|-----------|
|                          | Cut-off | Sens;Spec | Cut-off | Sens;Spec | Cut-off   | Sens;Spec | Cut-off   | Sens;Spec | Cut-off | Sens;Spec | Cut-off                    | Sens;Spec |
| <b>2-year remission</b>  | ≥6      | 81;70     | ≥7      | 76; 80    | ≥8        | 72; 82    | ≥4        | 78; 84    | ≥30     | 80;80     | ≥2                         | 75;79     |
| <b>10-year remission</b> | ≥7      | 64;67     | ≥7      | 45; 84    | ≥6        | 64; 66    | ≥2        | 73; 63    | ≥17     | 58;81     | ≥1                         | 61;80     |
| <b>Microvascular</b>     | ≥5      | 88;49     | ≥8      | 67; 79    | ≥8        | 70; 77    | ≥5        | 67; 83    | ≥30     | 76;73     | ≥1                         | 82;61     |
| <b>Macrovascular</b>     | ≥6      | 72;46     | ≥8      | 52; 80    | ≥8        | 56; 78    | ≥4        | 52; 76    | ≥29     | 58;72     | ≥2                         | 55;72     |

\* Optimal SOS cut-offs to be compared with previously reported estimates of Youden score cut-offs for short-term (1-2 year) prediction of diabetes remission in cohorts of varying composition: ABCD cut-off 4 or 6; DiaRem score cut-off 5, 6, 7 or 8; Ad-DiaRem score cut-off 7 or 10; DiaBetter score cut-off 3; IMS cut-off 47 (5, 8-11).

† In the statistical analysis, the true positive condition was designated for non-remission or development of diabetes complications at specified score cut-offs.

‡ Note that due to the high proportion of patients with screen-detected diabetes in the SOS study, these cut-offs should be interpreted with caution, and validated with external cohorts, and thus not viewed upon as a clinically reliable cut-offs for treatment recommendations.

**sTable 5. Derivation and validation of risk prediction models - a literature overview**

| Reference                 | Data collection | Derivation/validation | Tested scores/discrimination |                | Surgery      | Population                    | Follow-up  |
|---------------------------|-----------------|-----------------------|------------------------------|----------------|--------------|-------------------------------|------------|
|                           |                 |                       | Score                        | AUROC          |              |                               |            |
| Lee et al. (3)            | Retro.          | Derivation ABCD       | ABCD                         | n.r.           | RYGB, MGB    | N=63, Asian                   | 12 months  |
|                           | Prosp.          | Validation            | ABCD                         | n.r.           | RYGB, MGB    | N=176, Asian                  | 12 months  |
| Still et al. (4)          | Retro.          | Derivation DiaRem     | DiaRem                       | n.r.           | RYGB         | N=690                         | ≥14 months |
|                           | n.r.            | Validation cohort 1   | DiaRem                       | n.r.           | RYGB         | N=276                         | 14 months  |
|                           | n.r.            | Validation cohort 2   | DiaRem                       | n.r.           | RYGB         | N=113                         | 14 months  |
| Aminian et al. (12)       | Retro.          | Validation            | DiaRem                       | n.r.           | RYGB         | N=136, USA                    | >5 years   |
| Sampaio-Neto et al. (13)  | Retro.          | Validation            | DiaRem                       | 0.841          | RYGB         | N=70, Brazil                  | 12 months  |
| Cotillard et al. (14)     | Prosp.          | Validation            | DiaRem                       | n.r.           | RYGB         | N=84, France                  | 12 months  |
| Wood et al. (15)          | Retro.          | Validation            | DiaRem                       | n.r.           | RYGB         | N=407, Non-hispanic white     | ≥5 years   |
| Lee et al. (16)           | Retro.          | Validation            | DiaRem<br>ABCD               | n.r.<br>n.r.   | Mixed GBP    | N=245, China                  | 12 months  |
| Mehaffey et al. (17)      | Prosp.          | Validation            | DiaRem                       | n.r.           | RYGB         | N=31, USA                     | 10 years   |
| Tharakan et al. (18)      | Retro.          | Validation            | DiaRem                       | n.r.           | RYGB         | N=262, Ethnically diverse, UK | 12 months  |
| Honarmand et al. (8)      | Retro.          | Validation            | DiaRem                       | 0.776*         | RYGB         | N=900, Canada                 | 12 months  |
| Aron-Wisnewsky et al. (5) | Retro.          | Derivation Ad-DiaRem  | DiaRem<br>Ad-DiaRem          | 0.856<br>0.911 | RYGB         | N=213, France                 | 12 months  |
|                           | Retro.          | Validation cohort 1   | DiaRem<br>Ad-DiaRem          | 0.893<br>0.939 | RYGB         | N=134, France                 | 12 months  |
|                           | Retro.          | Validation cohort 2   | DiaRem<br>Ad-DiaRem          | 0.825<br>0.882 | RYGB         | N=99, Israel                  | 12 months  |
| Wood et al. (10)          | Retro.          | Validation            | DiaRem                       | 0.825          | RYGB, GB, SG | N=520, White/Hispanic         | 24 months  |
| Pucci et al. (6)          | Retro.          | Derivation DiaBetter  | DiaRem<br>DiaBetter          | 0.865<br>0.867 | RYGB, SG     | N=210, ≈76% Asian             | 24 months  |
|                           |                 | Validation            | DiaRem<br>DiaBetter          | 0.821<br>0.823 | RYGB, SG     | N=173, ≈76% Asian             | 24 months  |
| Ahuja et al. (11)         | Retro.          | Validation            | DiaRem<br>ABCD               | 0.844<br>0.769 | MGB, OAGB    | N=102, India                  | 12 months  |

|                     |        |                          |                                                 |                                           |                   |                 |           |
|---------------------|--------|--------------------------|-------------------------------------------------|-------------------------------------------|-------------------|-----------------|-----------|
| Dicker et al. (19)  | Retro. | Validation               | DiaRem<br>Ad-DiaRem                             | 0.78<br>0.85                              | RYGB<br>SG<br>GB  | N=1459, Israel  | 5 years   |
| Kam et al. (20)     | Retro. | Validation               | ABCD<br>DiaRem<br>Ad-DiaRem<br>DiaBetter        | 0.750<br>0.790<br>0.794<br>0.804          | RYGB              | N= 131, Chinese | 3 years   |
| Still et al. (21)   | Prosp. | Derivation: DiaRem2      | DiaRem<br>DiaRem2                               | 0.850<br>0.876                            | RYGB              | N=307, USA      | 12 months |
| Débedat et al. (22) | Prosp. | Derivation: 5y-Ad-DiaRem | DiaRem<br>Ad-DiaRem<br>5y-Ad-DiaRem             | 0.81<br>0.84<br>0.90                      | RYGB              | N=175, France   | 5 years   |
|                     | n.r.   | Validation               | DiaRem<br>Ad-DiaRem<br>5y-Ad-DiaRem             | 0.88<br>0.89<br>0.96                      |                   | N=54, France    | 5 years   |
|                     | Prosp. | Validation               | 5y-Ad-DiaRem                                    | 0.85                                      |                   | N=20, Italy     | 5 years   |
|                     | n.r.   | Validation               | 5y-Ad-DiaRem                                    | 0.92                                      |                   | N=50, Germany   | 5 years   |
| Aminian et al. (7)  | Retro. | Derivation IMS           | IMS                                             | n.r.                                      | RYGB, SG          | N=659, USA      | ≥5 years  |
|                     | Retro. | Validation               | IMS                                             | n.r.                                      | RYGB, SG          | N=241, USA      | ≥5 years  |
| Chen et al. (23)    | Retro. | Validation               | ABCD<br>IMS                                     | n.r.*                                     | RYGB,<br>SAGB, SG | N=310           | ≥5 years  |
| Shen et al. (24)    | Retro. | Validation               | DiaRem<br>Ad-DiaRem<br>DiaBetter<br>ABCD<br>IMS | 0.804<br>0.849<br>0.826<br>0.824<br>0.849 | SG                | N=128, Asian    | 12 months |

IMS, Individualized Metabolic Surgery score; RYGB, Roux-en-Y Gastric Bypass; GBP, gastric bypass; GB, adjustable gastric banding; SG, sleeve gastrectomy; MGB, Mini Gastric Bypass; OAGB, One Anastomosis Gastric Bypass; AUROC, Area Under Receiver Operating Characteristic curve; Retro, retrospective; Prosp., prospective, n.r., not reported. \*Analysis limited to complete remission. Table adapted from Zhang et al. (25)

**sFigure 1. Patient eligibility and remission/complication rates during follow-up**

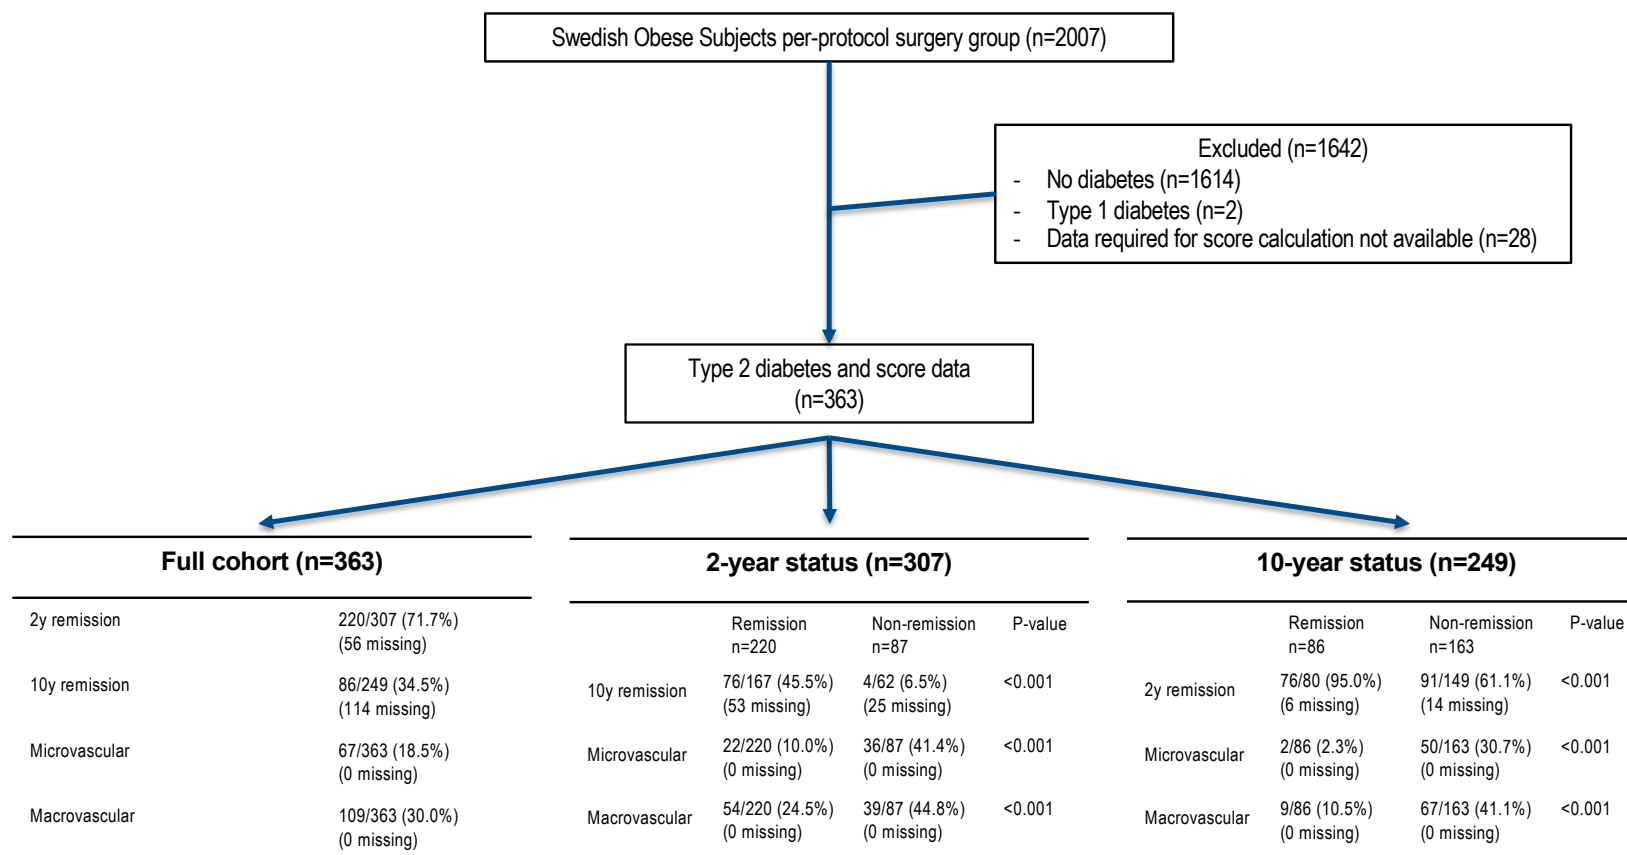

**sFigure 2. Illustration of diabetes remission rate (2 and 10 years), and micro- and macrovascular complication rate (over 15 years) by previously proposed score groups using data from the SOS study.**

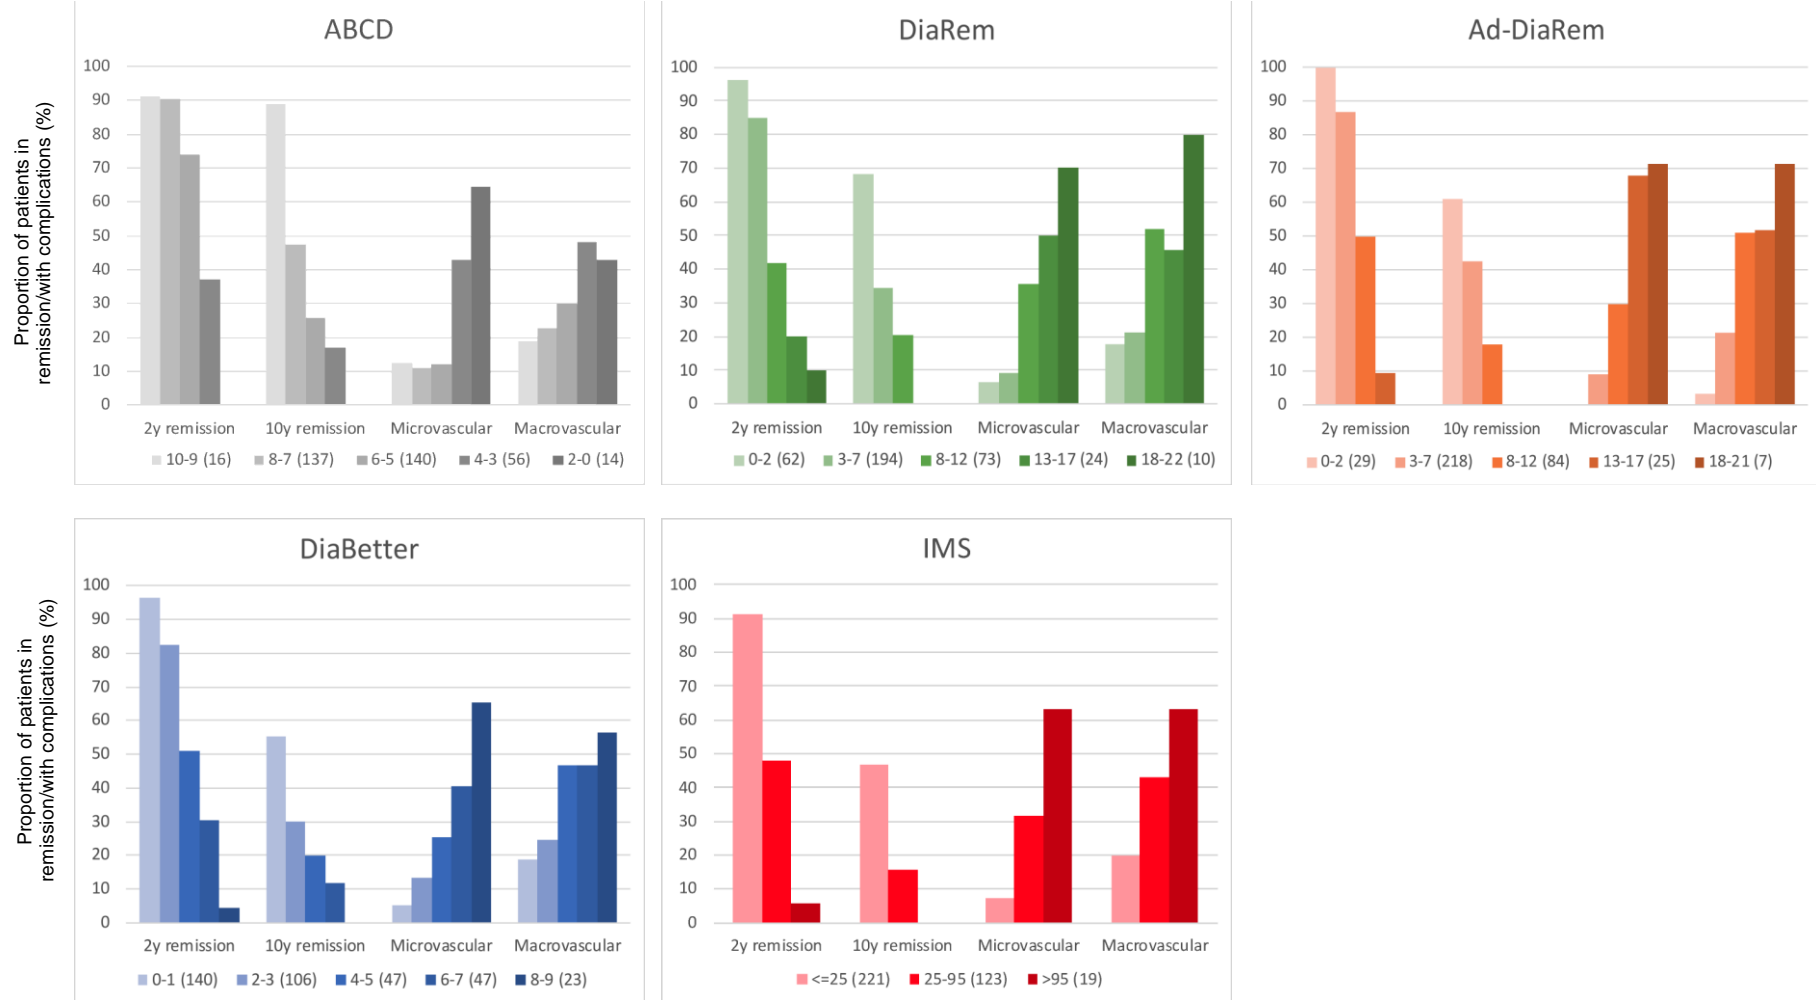

Bar colors indicate score groups: The number of individuals with register data on microvascular/macrovascular complications are indicated in parenthesis (note that for some patients, information on remission status at 2 or 10 years was not available (missing values are reported in sFigure 1)).

**Figure 3.** Comparison of the diagnostic value of the ABCD (grey squares), DiaRem (green circles), DiaBetter (blue circles), Ad-DiaRem (orange circles), and IMS (red triangles) scores, and diabetes duration (purple circles) for *complete* diabetes remission in the SOS surgery group after 2 years (panel A) and 10 years (panel B) of follow-up.

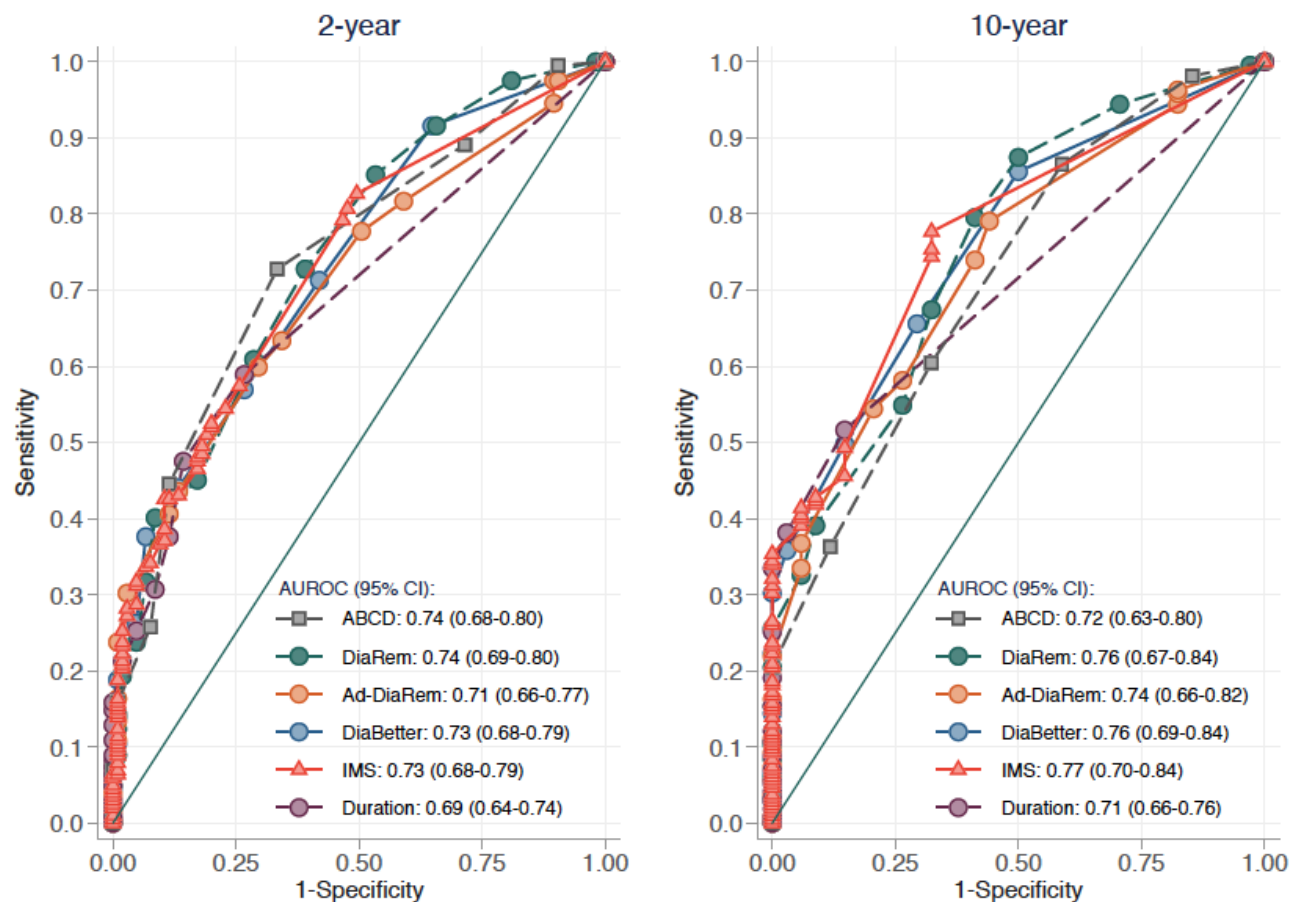

Nonparametric receiver operating characteristic curves (AUROCs) were used to test the accuracy of the prediction models. The closer the area under the curve is to a value of 1, the more accurate the model. Sensitivity is shown on the y-axis and specificity on the x-axis. The diagonal line (reference) is the line of no discrimination; it divides the ROC space into two, the points above the diagonal represent classification results better than random.

**sFigure 4. Calibration plot depicting predicted chance of type 2 diabetes remission (DiaRem (6), Ad-DiaRem (19) and DiaBetter (6)) against observed type 2 diabetes remission (SOS surgery group) 2 years after bariatric surgery.**

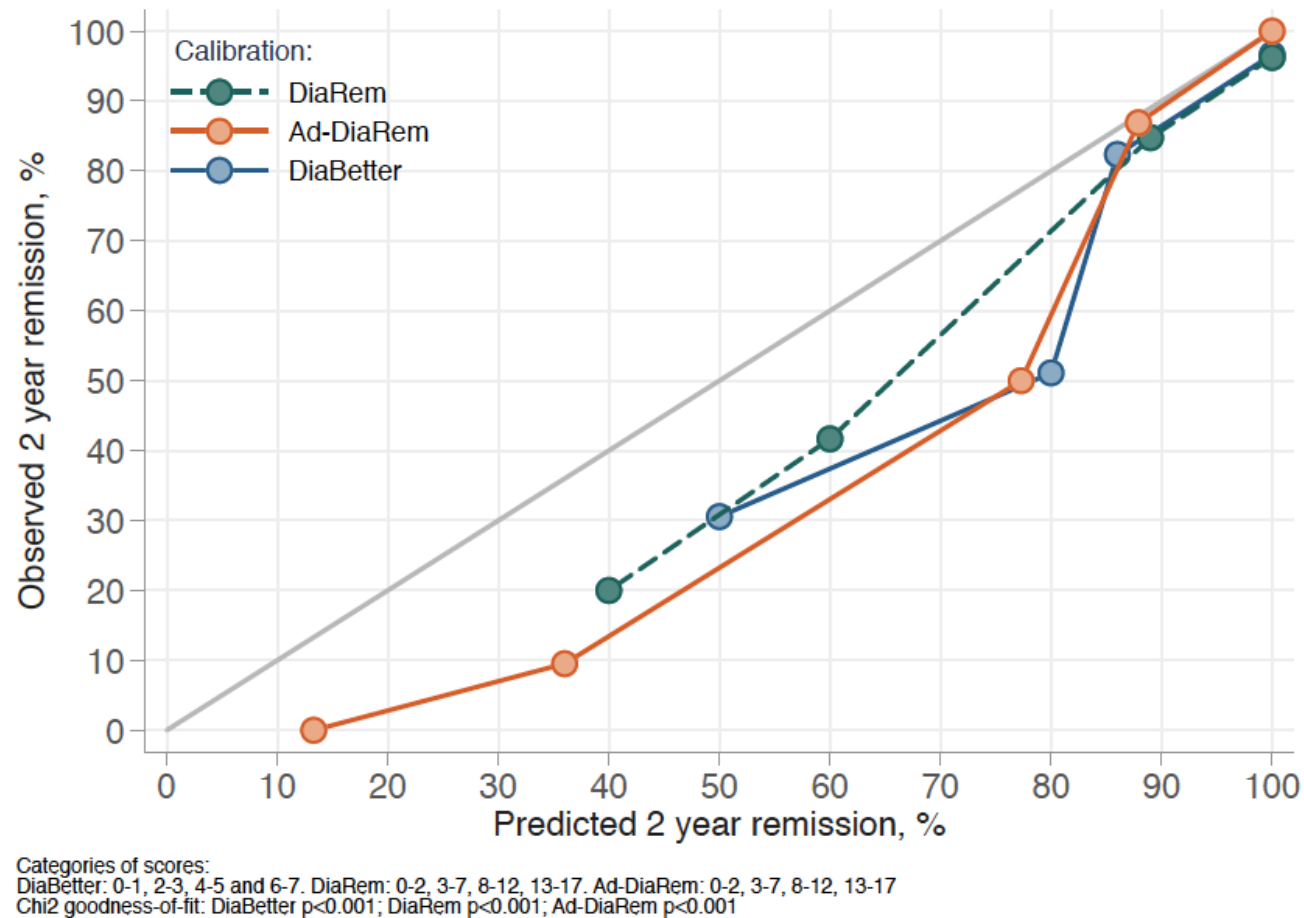

The solid line (45°) from zero denotes ideal calibration (slope=1, intercept=0) and the other lines are calibration curves for each score. Note that the highest score groups (DiaRem 18-21, Ad-DiaRem 18-22, DiaBetter 8-9) were excluded due to low numbers of events.



## References

1. Pocock SJ, Simon R. Sequential treatment assignment with balancing for prognostic factors in the controlled clinical trial. *Biometrics* 1975;31:103-115
2. Waaler HT. Height, weight and mortality. The Norwegian experience. *Acta Med Scand Suppl* 1984;679:1-56
3. Lee WJ, Hur KY, Lakadawala M, Kasama K, Wong SK, Chen SC, Lee YC, Ser KH. Predicting success of metabolic surgery: age, body mass index, C-peptide, and duration score. *Surg Obes Relat Dis* 2013;9:379-384
4. Still CD, Wood GC, Benotti P, Petrick AT, Gabrielsen J, Strodel WE, Ibele A, Seiler J, Irving BA, Celaya MP, Blackstone R, Gerhard GS, Argyropoulos G. Preoperative prediction of type 2 diabetes remission after Roux-en-Y gastric bypass surgery: a retrospective cohort study. *Lancet Diabetes Endocrinol* 2014;2:38-45
5. Aron-Wisnewsky J, Sokolovska N, Liu Y, Comaneshter DS, Vinker S, Pecht T, Poitou C, Oppert JM, Bouillot JL, Genser L, Dicker D, Zucker JD, Rudich A, Clement K. The advanced-DiaRem score improves prediction of diabetes remission 1 year post-Roux-en-Y gastric bypass. *Diabetologia* 2017;60:1892-1902
6. Pucci A, Tymoszek U, Cheung WH, Makaronidis JM, Scholes S, Tharakan G, Elkalaawy M, Guimaraes M, Nora M, Hashemi M, Jenkinson A, Adamo M, Monteiro MP, Finer N, Batterham RL. Type 2 diabetes remission 2 years post Roux-en-Y gastric bypass and sleeve gastrectomy: the role of the weight loss and comparison of DiaRem and DiaBetter scores. *Diabet Med* 2018;35:360-367
7. Aminian A, Brethauer SA, Andalib A, Nowacki AS, Jimenez A, Corcelles R, Hanipah ZN, Puchai S, Bhatt DL, Kashyap SR, Burguera B, Lacy AM, Vidal J, Schauer PR. Individualized Metabolic Surgery Score: Procedure Selection Based on Diabetes Severity. *Ann Surg* 2017;266:650-657
8. Honarmand K, Chetty K, Vanniyasingam T, Anvari M, Chetty VT. Type 2 diabetes remission rates 1-year post-Roux-en-Y gastric bypass and validation of the DiaRem score: the Ontario Bariatric Network experience. *Clin Obes* 2017;7:176-182
9. Shen SC, Wang W, Tam KW, Chen HA, Lin YK, Wang SY, Huang MT, Su YH. Validating Risk Prediction Models of Diabetes Remission After Sleeve Gastrectomy. *Obes Surg* 2019;29:221-229
10. Wood GC, Horwitz D, Still CD, Mirshahi T, Benotti P, Parikh M, Hirsch AG. Performance of the DiaRem Score for Predicting Diabetes Remission in Two Health Systems Following Bariatric Surgery Procedures in Hispanic and non-Hispanic White Patients. *Obes Surg* 2018;28:61-68
11. Ahuja A, Tantia O, Chaudhuri T, Khanna S, Seetharamaiah S, Majumdar K, Goyal G. Predicting remission of diabetes post metabolic surgery: a comparison of ABCD, diarem, and DRS scores. *Obes Surg* 2018;28:2025-2031
12. Aminian A, Brethauer SA, Kashyap SR, Kirwan JP, Schauer PR. DiaRem score: external validation. *Lancet Diabetes Endocrinol* 2014;2:12-13
13. Sampaio-Neto J, Nassif LS, Branco-Filho AJ, Bolfarini LA, Loro LS, de Souza MP, Bianco T. External Validation of the Diarem Score as Remission Predictor of Diabetes Mellitus Type 2 in Obese Patients Undergoing Roux-En-Y Gastric Bypass. *Arq Bras Cir Dig* 2015;28 Suppl 1:19-22

14. Cotillard A, Poitou C, Duchateau-Nguyen G, Aron-Wisnewsky J, Bouillot JL, Schindler T, Clement K. Type 2 Diabetes Remission After Gastric Bypass: What Is the Best Prediction Tool for Clinicians? *Obes Surg* 2015;25:1128-1132
15. Wood GC, Mirshahi T, Still CD, Hirsch AG. Association of DiaRem Score With Cure of Type 2 Diabetes Following Bariatric Surgery. *JAMA Surg* 2016;151:779-781
16. Lee WJ, Chong K, Chen SC, Zachariah J, Ser KH, Lee YC, Chen JC. Preoperative Prediction of Type 2 Diabetes Remission After Gastric Bypass Surgery: a Comparison of DiaRem Scores and ABCD Scores. *Obes Surg* 2016;26:2418-2424
17. Mehaffey JH, Mullen MG, Mehaffey RL, Turrentine FE, Malin SK, Kirby JL, Schirmer B, Hallowell PT. Type 2 diabetes remission following gastric bypass: does diarem stand the test of time? *Surg Endosc* 2017;31:538-542
18. Tharakan G, Scott R, Szepietowski O, Miras AD, Blakemore AI, Purkayastha S, Ahmed A, Chahal H, Tan T. Limitations of the DiaRem Score in Predicting Remission of Diabetes Following Roux-En-Y Gastric Bypass (RYGB) in an ethnically Diverse Population from a Single Institution in the UK. *Obes Surg* 2017;27:782-786abcd
19. Dicker D, Golan R, Aron-Wisnewsky J, Zucker JD, Sokolowska N, Comaneshter DS, Yahalom R, Vinker S, Clement K, Rudich A. Prediction of Long-Term Diabetes Remission After RYGB, Sleeve Gastrectomy, and Adjustable Gastric Banding Using DiaRem and Advanced-DiaRem Scores. *Obes Surg* 2019;29:796-804
20. Kam H, Tu Y, Pan J, Han J, Zhang P, Bao Y, Yu H. Comparison of Four Risk Prediction Models for Diabetes Remission after Roux-en-Y Gastric Bypass Surgery in Obese Chinese Patients with Type 2 Diabetes Mellitus. *Obes Surg* 2020;
21. Still CD, Benotti P, Mirshahi T, Cook A, Wood GC. DiaRem2: Incorporating duration of diabetes to improve prediction of diabetes remission after metabolic surgery. *Surg Obes Relat Dis* 2019;15:717-724
22. Debédât J, Sokolowska N, Coupaye M, Panunzi S, Chakaroun R, Genser L, de Turenne G, Bouillot JL, Poitou C, Oppert JM, Bluher M, Stumvoll M, Mingrone G, Ledoux S, Zucker JD, Clement K, Aron-Wisnewsky J. Long-term Relapse of Type 2 Diabetes After Roux-en-Y Gastric Bypass: Prediction and Clinical Relevance. *Diabetes Care* 2018;41:2086-2095
23. Chen JC, Hsu NY, Lee WJ, Chen SC, Ser KH, Lee YC. Prediction of type 2 diabetes remission after metabolic surgery: a comparison of the individualized metabolic surgery score and the ABCD score. *Surg Obes Relat Dis* 2018;14:640-645
24. Shen SC, Wang W, Tam KW, Chen HA, Lin YK, Wang SY, Huang MT, Su YH. Validating Risk Prediction Models of Diabetes Remission After Sleeve Gastrectomy. *Obes Surg* 2018;
25. Zhang R, Borisenko O, Telegina I, Hargreaves J, Ahmed AR, Sanchez Santos R, Pring C, Funch-Jensen P, Dillemans B, Hedenbro JL. Systematic review of risk prediction models for diabetes after bariatric surgery. *Br J Surg* 2016;103:1420-1427
